# Supplementary material for: Socioeconomic status in relation to cardiovascular disease and cause-specific mortality: a comparison of Asian and Australasian populations in a pooled analysis
Source: HighWire-hosted journal article supplement (doi:10.1136/bmjopen-2014-006408), 2015-03-01
Supplement: bmjopen-2014-006408supp.pdf [file bmjopen-2014-006408supp.pdf]

## **Appendix**

**APCSC Executive Committee:** R. Huxley, X. Fang, D.F. Gu, Y. Imai, T.H. Lam, W.H. Pan, A. Rodgers, I. Suh, H.C. Kim, H. Ueshima, M. Woodward (Chair)

**Participating Studies and Principal Collaborators in APCSC:** Aito Town: A. Okayama, H. Ueshima; H. Maegawa; Akabane: M. Nakamura, N. Aoki; Anzhen02: Z.S. Wu; Anzhen: C.H. Yao, Z.S. Wu; Australian Longitudinal Study of Aging: Mary Luszcz; Australian National Heart Foundation: T.A. Welborn; Beijing Aging: Z. Tang; Beijing Steelworkers: L.S. Liu, J.X. Xie; Blood Donors' Health: R. Norton, S. Ameratunga, S. MacMahon, G. Whitlock; Busselton: M.W. Knuiman; Canberra-Queanbeyan: H. Christensen; Capital Iron and Steel Company: X.G. Wu; CISCH: J. Zhou, X.H. Yu; Civil Service Workers: A. Tamakoshi; CVDFACTS: W.H. Pan; East Beijing: Z.L. Wu, L.Q. Chen, G.L. Shan; Electricity Generating Authority of Thailand: P. Sritara; Fangshan: D.F. Gu, X.F. Duan; Fletcher Challenge: S. MacMahon, R. Norton, G. Whitlock, R. Jackson; Guangzhou: Y.H. Li; Guangzhou Occupational: T.H. Lam, C.Q. Jiang; Hisayama: Y. Kiyohara, H. Arima, M. Iida; Hong Kong: J. Woo, S.C. Ho; Huashan: Z. Hong, M.S. Huang, B. Zhou; Kinmen: J.L. Fuh; Konan: H. Ueshima, Y. Kita, S.R. Choudhury; KMIC: I. Suh, S.H. Jee, I.S. Kim; Melbourne: G.G. Giles; Miyama: T. Hashimoto, K. Sakata; Newcastle: A. Dobson; Ohasama: Y. Imai, T. Ohkubo, A. Hozawa; Perth: K. Jamrozik, M. Hobbs, R. Broadhurst; Saitama: K. Nakachi; Seven Cities: X.H. Fang, S.C. Li, Q.D. Yang; Shanghai Factory Workers: Z.M. Chen; Shibata: H. Tanaka; Shigaraki Town: Y. Kita, A. Nozaki, H. Ueshima; Shirakawa: H. Horibe, Y. Matsutani, M. Kagaya; Singapore Heart: K. Hughes, J. Lee; Singapore NHS92: D. Heng, S.K. Chew; Six Cohorts: B.F. Zhou, H.Y. Zhang; Tanno/Soubetsu: K. Shimamoto, S. Saitoh; Tianjin: Z.Z. Li, H.Y. Zhang; Western Australia AAA Screenees: P. Norman, K. Jamrozik; Xi'an: Y. He, T.H. Lam; Yunnan: S.X. Yao.

**Appendix table 1. Patterns of missing data**

| Variables        | % of missing data |  |      |  |
|------------------|-------------------|--|------|--|
|                  | Australasia       |  | Asia |  |
| Cholesterol      | 16.3              |  | 80.9 |  |
| Diabetes         | 2.9               |  | 79.9 |  |
| BMI              | 1.1               |  | 69.1 |  |
| Alcohol drinking | 1.5               |  | 3.3  |  |
| Smoking          | 0.1               |  | 0.4  |  |

  

| Cumulative<br>number of<br>missing values | Australasia |      | Asia   |      |
|-------------------------------------------|-------------|------|--------|------|
|                                           | n           | %    | n      | %    |
| None                                      | 70116       | 80.8 | 21637  | 10.0 |
| 1                                         | 15329       | 17.7 | 22239  | 10.3 |
| 2                                         | 556         | 0.6  | 36060  | 16.7 |
| 3                                         | 817         | 0.9  | 134993 | 62.4 |
| 4                                         | 16          | 0.0  | 781    | 0.4  |
| 5                                         | 1           | 0.0  | 491    | 0.2  |

BMI = body mass index

**Appendix table 2. Summary characteristics of subjects from studies with complete data**

|                        | <b>N</b>     | <b>Baseline year (range)</b> | <b>Median follow-up (years)</b> | <b>% female</b> | <b>Mean age (years) (SD)</b> | <b>Total deaths</b> | <b>Total CVD</b> |
|------------------------|--------------|------------------------------|---------------------------------|-----------------|------------------------------|---------------------|------------------|
| <b>Australasia</b>     | <b>70116</b> | <b>78 - 94</b>               | <b>8.1</b>                      | <b>52</b>       | <b>51 (12)</b>               | <b>3344</b>         | <b>1308</b>      |
| ALSA                   | 417          | 92 - 93                      | 4.7                             | 35              | 78 (6)                       | 167                 | 72               |
| ANHF                   | 9098         | 89 - 90                      | 8.3                             | 51              | 43 (13)                      | 374                 | 115              |
| Fletcher Challenge     | 10104        | 92 - 94                      | 5.8                             | 28              | 44 (15)                      | 372                 | 465              |
| Melbourne              | 41122        | 90 - 94                      | 8.5                             | 59              | 55 (9)                       | 2081                | 551              |
| Newcastle              | 3394         | 83 - 94                      | 8.9                             | 50              | 52 (10)                      | 516                 | 204              |
| Perth                  | 5981         | 78 - 94                      | 14.4                            | 51              | 45 (13)                      | 299                 | 103              |
| <b>Asia</b>            | <b>21637</b> | <b>85 - 97</b>               | <b>6.0</b>                      | <b>41</b>       | <b>49 (14)</b>               | <b>1123</b>         | <b>501</b>       |
| Akabane                | 1801         | 85 - 86                      | 11.0                            | 55              | 54 (8)                       | 133                 | 77               |
| Beijing Aging          | 1687         | 92                           | 4.8                             | 51              | 70 (9)                       | 428                 | 204              |
| CVDFACTS               | 5524         | 88 - 96                      | 6.0                             | 55              | 47 (15)                      | 228                 | 60               |
| EGAT                   | 3487         | 85                           | 11.4                            | 23              | 43 (5)                       | 165                 | 51               |
| Fangshan               | 797          | 91 - 92                      | 3.6                             | 66              | 47 (10)                      | 48                  | 51               |
| Guangzhou Occupational | 1821         | 85 - 97                      | 7.1                             | 22              | 41 (6)                       | 2398                | 568              |
| Hong Kong              | 187          | 85 - 91                      | 2.5                             | 57              | 79 (7)                       | 652                 | 202              |
| Miyama                 | 405          | 88 - 90                      | 6.6                             | 56              | 61 (10)                      | 88                  | 22               |
| Singapore NHS92        | 3302         | 92                           | 6.2                             | 52              | 39(12)                       | 71                  | 78               |
| Yunnan                 | 2626         | 92                           | 4.5                             | 3               | 56 (9)                       | 631                 | 222              |
| <b>Overall</b>         | <b>91753</b> | <b>78 - 97</b>               | <b>7.9</b>                      | <b>49</b>       | <b>51 (13)</b>               | <b>4467</b>         | <b>1809</b>      |

SD = standard deviation, CVD = cardiovascular disease (comprise of fatal and nonfatal events), APCSC = Asia Pacific Cohort Study Collaboration, ALSA = Australian Longitudinal Study of Aging; ANHF = Australian National Heart Foundation; WA AAA Screenees = Western Australian Abdominal Aortic Aneurysm Screenees; CISCH = Capital Iron and Steel Company Hospital; NHS92 = National Health Study 1992; CVDFACTS = Cardiovascular Disease Risk Factors Two-Township Study; EGAT = Electricity Generating Authority of Thailand Study

**Appendix table 3. Baseline age and sex-adjusted mean value (or percentage, where stated) by level of education attained. (complete case analysis)**

|                                      | Educational attainment |           |                 | p-value |
|--------------------------------------|------------------------|-----------|-----------------|---------|
|                                      | Tertiary               | Secondary | Primary or none |         |
| <b>Australasia</b>                   |                        |           |                 |         |
| <i>n</i>                             | 17939                  | 19774     | 32403           |         |
| Age (year)                           | 51                     | 53        | 57              | <0.0001 |
| % Female                             | 40                     | 43        | 53              | <0.0001 |
| Body mass index (kg/m <sup>2</sup> ) | 25.2                   | 26.0      | 27.0            | <0.0001 |
| Systolic blood pressure (mmHg)       | 130                    | 132       | 134             | <0.0001 |
| Total blood cholesterol (mmol/l)     | 5.5                    | 5.6       | 5.6             | <0.0001 |
| % Cigarette smokers                  | 11                     | 20        | 23              | <0.0001 |
| % Alcohol drinkers <sup>1</sup>      | 86                     | 81        | 72              | <0.0001 |
| % Diabetes                           | 1.5                    | 2.3       | 3.8             | <0.0001 |
| <b>Asia</b>                          |                        |           |                 |         |
| <i>n</i>                             | 2752                   | 5557      | 13328           |         |
| Age (year)                           | 48                     | 48        | 56              | <0.0001 |
| % Female                             | 32                     | 35        | 49              | <0.0001 |
| Body mass index (kg/m <sup>2</sup> ) | 22.4                   | 22.6      | 22.9            | <0.0001 |
| Systolic blood pressure (mmHg)       | 123                    | 124       | 124             | <0.0001 |
| Total blood cholesterol (mmol/l)     | 5.0                    | 4.9       | 4.9             | <0.0001 |
| % Cigarette smokers                  | 14                     | 21        | 32              | <0.0001 |
| % Alcohol drinkers <sup>1</sup>      | 29                     | 33        | 32              | 0.025   |
| % Diabetes                           | 3.1                    | 3.1       | 3.2             | 0.7     |

<sup>1</sup>Excluding Canberra, Anzhen 02 and Xian studies where information on alcohol drinking was not collected

**Appendix table 4. Hazard ratios (95% confidence interval) for education in relation to major causes of death in the APCSC (complete case analysis)**

| Adjustment                            | Educational attainment |                  |                   | P-value for linearity | P-value for interaction by region |
|---------------------------------------|------------------------|------------------|-------------------|-----------------------|-----------------------------------|
|                                       | Tertiary               | Secondary        | Primary or none   |                       |                                   |
| <b>All-cause mortality</b>            |                        |                  |                   |                       |                                   |
| <i>Australasia</i>                    | <i>(e = 632)</i>       | <i>(e = 784)</i> | <i>(e = 1928)</i> |                       |                                   |
| Age, sex                              | 1                      | 1.08 (0.96-1.21) | 1.20 (1.09-1.33)  | 0.0001                |                                   |
| Multiple                              | 1                      | 1.02 (0.91-1.14) | 1.10 (0.99-1.22)  | 0.046                 |                                   |
| <i>Asia</i>                           | <i>(e = 65)</i>        | <i>(e = 164)</i> | <i>(e = 894)</i>  |                       |                                   |
| Age, sex                              | 1                      | 1.30 (0.97-1.73) | 1.92 (1.47-2.52)  | <0.0001               |                                   |
| Multiple                              | 1                      | 1.24 (0.93-1.65) | 1.81 (1.38-2.36)  | <0.0001               | 0.0005                            |
| <b>CVD mortality</b>                  |                        |                  |                   |                       |                                   |
| <i>Australasia</i>                    | <i>(e = 188)</i>       | <i>(e = 246)</i> | <i>(e = 587)</i>  |                       |                                   |
| Age, sex                              | 1                      | 1.17 (0.95-1.44) | 1.48 (1.22-1.79)  | <0.0001               |                                   |
| Multiple                              | 1                      | 1.06 (0.86-1.30) | 1.24 (1.02-1.51)  | 0.01                  |                                   |
| <i>Asia</i>                           | <i>(e = 16)</i>        | <i>(e = 61)</i>  | <i>(e = 329)</i>  |                       |                                   |
| Age, sex                              | 1                      | 2.03 (1.17-3.54) | 2.51 (1.49-4.23)  | 0.0006                |                                   |
| Multiple                              | 1                      | 1.92 (1.10-3.34) | 2.47 (1.47-4.17)  | 0.0005                | 0.053                             |
| <b>Cancer mortality</b>               |                        |                  |                   |                       |                                   |
| <i>Australasia</i>                    | <i>(e = 285)</i>       | <i>(e = 371)</i> | <i>(e = 943)</i>  |                       |                                   |
| Age, sex                              | 1                      | 1.03 (0.88-1.20) | 1.07 (0.93-1.24)  | 0.29                  |                                   |
| Multiple                              | 1                      | 0.99 (0.84-1.16) | 1.01 (0.87-1.17)  | 0.85                  |                                   |
| <i>Asia</i>                           | <i>(e = 18)</i>        | <i>(e = 43)</i>  | <i>(e = 229)</i>  |                       |                                   |
| Age, sex                              | 1                      | 1.25 (0.72-2.17) | 1.85 (1.11-3.09)  | 0.008                 |                                   |
| Multiple                              | 1                      | 1.20 (0.69-2.09) | 1.66 (1.00-2.78)  | 0.03                  | 0.11                              |
| <b>Non CVD - non cancer mortality</b> |                        |                  |                   |                       |                                   |
| <i>Australasia</i>                    | <i>(e = 159)</i>       | <i>(e = 167)</i> | <i>(e = 398)</i>  |                       |                                   |
| Age, sex                              | 1                      | 1.10 (0.87-1.40) | 1.21 (0.97-1.51)  | 0.08                  |                                   |
| Multiple                              | 1                      | 1.10 (0.86-1.40) | 1.19 (0.96-1.49)  | 0.11                  |                                   |
| <i>Asia</i>                           | <i>(e = 31)</i>        | <i>(e = 60)</i>  | <i>(e = 336)</i>  |                       |                                   |
| Age, sex                              | 1                      | 0.96 (0.62-1.48) | 1.69 (1.13-2.52)  | 0.001                 |                                   |
| Multiple                              | 1                      | 0.93 (0.60-1.44) | 1.62 (1.09-2.41)  | 0.002                 | 0.04                              |

In Model 1, educational attainment is adjusted for age at survey, sex and study

In Model 2, educational attainment is adjusted for the covariates in model 1 plus BMI, SBP, smoking, alcohol drinking, diabetes, total cholesterol.

CVD = cardiovascular disease, *e* = events (deaths)

**Appendix table 5. Hazard ratios (95% confidence interval) for education in relation to cardiovascular diseases in the APCSC (complete case analysis)**

| Adjustment                       | Educational attainment |                  |                  | P-value for linearity | P-value for interaction by region |
|----------------------------------|------------------------|------------------|------------------|-----------------------|-----------------------------------|
|                                  | Tertiary               | Secondary        | Primary or none  |                       |                                   |
| <b>Fatal and nonfatal CVD</b>    |                        |                  |                  |                       |                                   |
| <i>Australasia</i>               | <i>(e = 271)</i>       | <i>(e = 407)</i> | <i>(e = 630)</i> |                       |                                   |
| Age, sex                         | 1                      | 1.18 (1.00-1.39) | 1.46 (1.24-1.72) | <0.0001               |                                   |
| Multiple                         | 1                      | 1.05 (0.89-1.24) | 1.23 (1.04-1.46) | 0.01                  |                                   |
| <i>Asia</i>                      | <i>(e = 22)</i>        | <i>(e = 70)</i>  | <i>(e = 409)</i> |                       |                                   |
| Age, sex                         | 1                      | 1.78 (1.10-2.89) | 2.14 (1.37-3.34) | 0.0009                |                                   |
| Multiple                         | 1                      | 1.70 (1.05-2.76) | 2.09 (1.34-3.26) | 0.001                 | 0.09                              |
| <b>Fatal and nonfatal CHD</b>    |                        |                  |                  |                       |                                   |
| <i>Australasia</i>               | <i>(e = 162)</i>       | <i>(e = 243)</i> | <i>(e = 386)</i> |                       |                                   |
| Age, sex                         | 1                      | 1.18 (0.96-1.46) | 1.50 (1.22-1.85) | <0.0001               |                                   |
| Multiple                         | 1                      | 1.01 (0.82-1.25) | 1.21 (0.98-1.50) | 0.05                  |                                   |
| <i>Asia</i>                      | <i>(e = 6)</i>         | <i>(e = 28)</i>  | <i>(e = 87)</i>  |                       |                                   |
| Age, sex                         | 1                      | 2.42 (1.00-5.88) | 2.57 (1.07-6.20) | 0.05                  |                                   |
| Multiple                         | 1                      | 2.28 (0.94-5.55) | 2.31 (0.96-5.60) | 0.10                  | 0.22                              |
| <b>Fatal and nonfatal stroke</b> |                        |                  |                  |                       |                                   |
| <i>Australasia</i>               | <i>(e = 66)</i>        | <i>(e = 128)</i> | <i>(e = 138)</i> |                       |                                   |
| Age, sex                         | 1                      | 1.30 (0.95-1.78) | 1.63 (1.16-2.28) | 0.005                 |                                   |
| Multiple                         | 1                      | 1.20 (0.88-1.65) | 1.44 (1.03-2.04) | 0.034                 |                                   |
| <i>Asia</i>                      | <i>(e = 10)</i>        | <i>(e = 26)</i>  | <i>(e = 196)</i> |                       |                                   |
| Age, sex                         | 1                      | 1.49 (0.71-3.11) | 1.96 (1.02-3.78) | 0.03                  |                                   |
| Multiple                         | 1                      | 1.42 (0.68-2.98) | 1.92 (0.99-3.70) | 0.03                  | 0.74                              |

In Model 1, educational attainment is adjusted for age at survey, sex and study

In Model 2, educational attainment is adjusted for the covariates in model 1 plus BMI, SBP, smoking, alcohol drinking, diabetes, total cholesterol.

CVD = cardiovascular disease, CHD = coronary heart disease, *e* = events

**Appendix table 6. Age and sex-adjusted hazard ratios (95% confidence intervals) for primary or below compared to tertiary education in relation to site-specific cancer mortality in the APCSC**

|                             | Number of deaths | Australasia       | Asia               |
|-----------------------------|------------------|-------------------|--------------------|
| Lung cancer                 | 1105             | 1.77 (1.32; 2.38) | 1.98 (1.33; 2.94)  |
| Liver cancer                | 461              | 0.79 (0.36; 1.76) | 1.58 (1.04; 2.40)  |
| Colon cancer                | 431              | 0.88 (0.65; 1.19) | 0.88 (0.41; 1.86)  |
| Upper aero-digestive cancer | 280              | 0.86 (0.48; 1.56) | 4.04 (1.94; 8.40)  |
| Stomach cancer              | 238              | 1.87 (0.95; 3.67) | 1.75 (0.82; 3.76)  |
| Breast cancer               | 218              | 0.69 (0.46; 1.03) | 1.17 (0.27; 5.11)  |
| Prostate cancer             | 181              | 0.72 (0.47; 1.09) | 0.15 (0.04; 0.54)  |
| Pancreas cancer             | 153              | 1.69 (0.91; 3.15) | 2.29 (0.52; 10.07) |
| Ovarian cancer              | 90               | 1.14 (0.58; 2.24) | 0.61 (0.18; 2.02)  |
